# Supplementary material
Source: PubMed Central journal article supplement (PMC3670316)
Supplement: 1222115110_pnas.201222115SI.pdf [file 1222115110_pnas.201222115SI.pdf]

# Supporting Information

Lopez and Fan 10.1073/pnas.1222115110

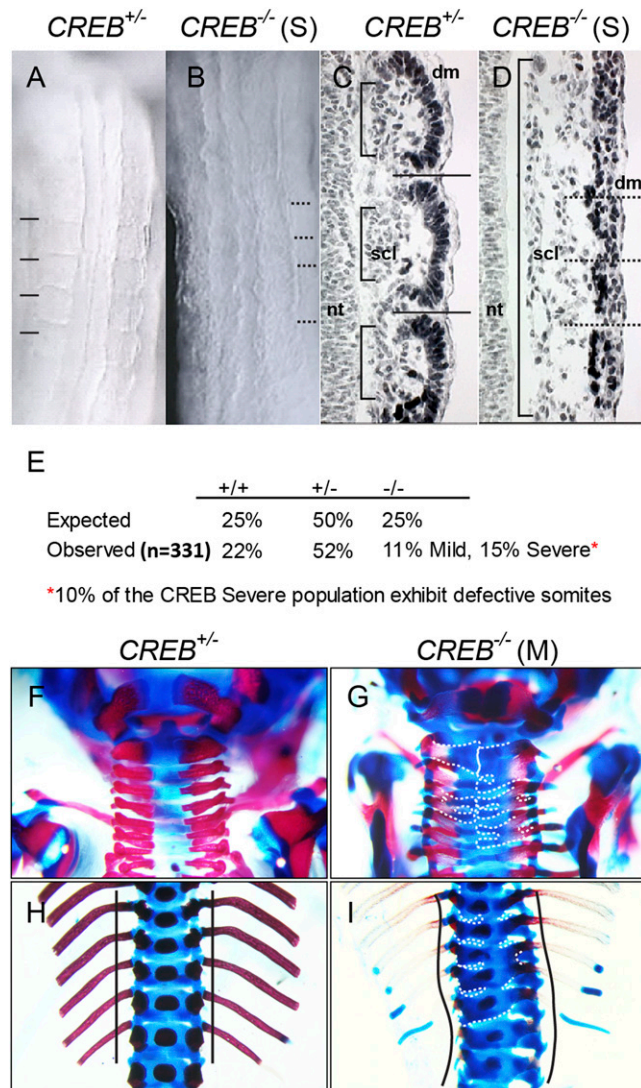

**Fig. S1.** Somitogenesis is defective in a small population of severe cAMP responsive element binding protein (*CREB*)-null embryos, whereas mild mutants exhibit sporadic skeletal fusions. (*A* and *B*) Bright-field images: (*A*) *CREB*<sup>+/-</sup> embryonic day (E) 9.5 somites exhibit somite boundaries at regular intervals (lines); and (*B*) *CREB*<sup>-/-</sup> severe (marked as "S") mutant somite boundaries appear to be lost (dotted lines). Posterior is to the top. (*C* and *D*) Horizontal sections of E9.5 embryos stained for Pax3. (*C*) *CREB*<sup>+/-</sup> embryos exhibit normal arch-like dermomyotome structures, somite boundaries (lines), and compacted sclerotomes (brackets). (*D*) The epithelial structures of the dermomyotome are lost in *CREB*<sup>-/-</sup> ("S") mutant; contributing to scattered sclerotomal cells (bracket) and a loss of somite boundaries (dotted lines). dm, dermomyotome; nt, neural tube; scl, sclerotome. (*E*) Table depicting expected Mendelian and observed percentages of a *CREB*<sup>+/-</sup> intercross. (*F*–*I*) Alizarin red and Alcian blue-stained E18.5 skeletons. (*F* and *H*) *CREB*<sup>+/-</sup> control (*G* and *I*) *CREB*<sup>-/-</sup> mild (marked as "M") mutant. (*F* and *G*) are dorsal images of cervical vertebrae. (*H* and *I*) are ventral images of thoracic and lumbar regions. White dotted lines trace fusion events in neural arches (*G*) and vertebral bodies (*I*). Black lines show the curvature of the spine in mutants (*I*) compared with control (*H*).

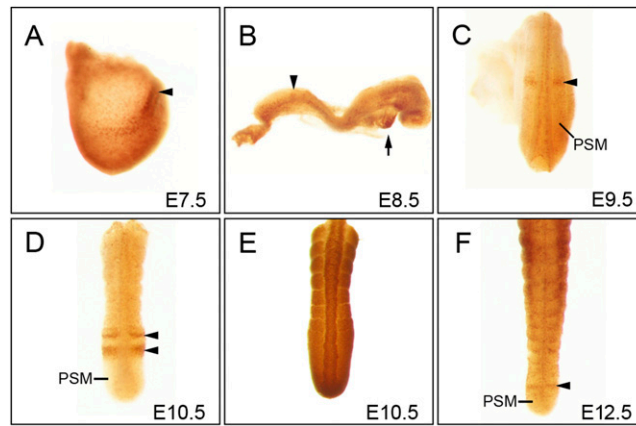

**Fig. S2.** Phosphorylated (P)-CREB is detected in the presomitic mesoderm (PSM) during most somite stages. (*A–D* and *F*) P-CREB whole-mount immunostaining of embryos during developmental stages E7.5 to E12.5. (*A* and *B*) Side view; anterior is to the right. (*C–F*) Dorsal view. (*A*) P-CREB was detected in the endocardial tube in E7.5 embryos (arrowhead). (*B–D* and *F*) P-CREB (arrowheads) was detected in the PSM as single or double stripes during somite stages E8.5 through E12.5. (*B*) P-CREB was detected in the heart at E8.5 (arrow). (*E*) CREB was ubiquitously expressed throughout the PSM and somites of an E10.5 mouse.







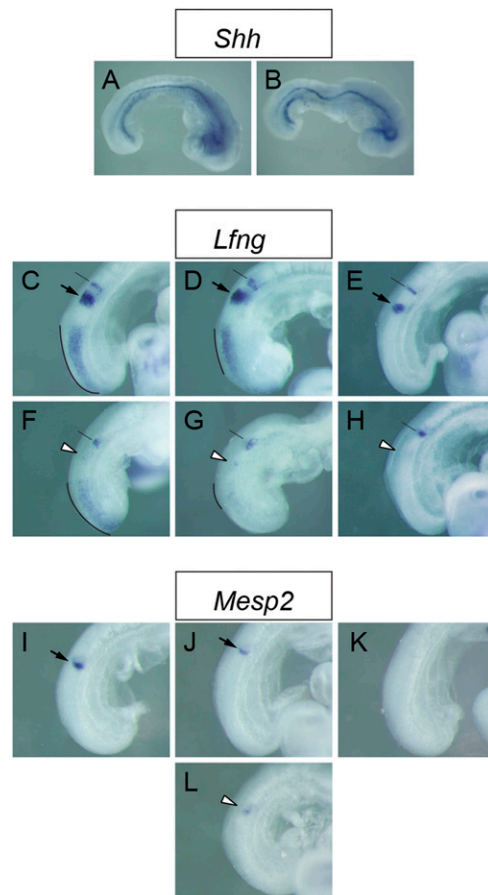

**Fig. S6.** Normal notochord patterning in mutants with defective Notch signaling and persistent *Mesp2* expression throughout segmentation. (A and B) *Shh* whole-mount in situ hybridization (WISH) analysis (A) *ROSA<sup>AC/AC</sup>* (control) and (B) *ROSA<sup>AC/AC</sup>;T-Cre* (mutant). (C–H) *Lunatic fringe* (*Lfng*) WISH analysis in control (C–E) and mutants (F–H). *Lfng* phase-matched embryos are C and F, D and G, and E and H. Note *Lfng* is expression is initiated in the mutant posterior PSM (C and F, curved lines). An intermediate *Lfng* stripe is reduced in mutants (F–H, white arrowheads;  $n = 6$ ) to controls (C–E, black arrows;  $n = 7$ ). (F–H) Anterior most *Lfng* stripe (line) in mutants ( $n = 5$ ) is indistinct compared with controls ( $n = 6$ ; C–E). (I–L) *Mesp2* WISH analysis in controls (I–K): (I) a *Mesp2* broad stripe (arrow) was observed in controls ( $n = 3$ ). (J) A narrow *Mesp2* stripe (arrow;  $n = 2$ ). (K) Some controls did not exhibit any *Mesp2* expression ( $n = 2$ ). (L) Mutants always expressed a single mosaic stripe (white arrowhead;  $n = 5$ ).

**Table S1. Down-regulated genes with full/half CRE-sites within the PSM CREB transcriptome**

| Gene symbol              | MGI database object name                                                     | Fold change down | CRE-site                |
|--------------------------|------------------------------------------------------------------------------|------------------|-------------------------|
| <i>Ripply2</i> ***       | Ripply2 homologue (zebrafish)                                                | 3.036            | Half, conserved         |
| <i>Gng4</i>              | Guanine nucleotide binding protein (G protein), $\gamma$ 4                   | 2.629            | Half, conserved         |
| <i>Rps27</i>             | Ribosomal protein S27                                                        | 2.611            | Half, conserved         |
| <i>Pcdh8</i> *           | Protocadherin 8                                                              | 2.597            | Half, conserved         |
| <i>Zfp61</i>             | Zinc finger protein 61                                                       | 2.357            | Half, nonconserved      |
| <i>Cnn2</i>              | Cytochrome P450, family 51                                                   | 2.273            | Half, nonconserved      |
| <i>Hoxd1</i> *           | Homeobox D1                                                                  | 2.157            | Half, nonconserved      |
| <i>Prodh</i>             | Proline dehydrogenase                                                        | 2.148            | Half, nonconserved      |
| <i>Ube2j1</i>            | Ubiquitin-conjugating enzyme E2, J1                                          | 2.083            | Half, conserved         |
| <i>Narg2</i>             | NMDA receptor-regulated gene 2                                               | 2.071            | Full and half conserved |
| <i>Sc5d</i>              | Sterol-C5-desaturase (fungal ERG3, $\delta$ -5-desaturase)                   | 2.007            | Half, conserved         |
| <i>Brca2</i>             | Breast cancer 2                                                              | 2.006            | Full and half conserved |
| <i>Ranbp6</i>            | RAN binding protein 6                                                        | 2.006            | Full and half conserved |
| <i>H2-T10 III H2-T22</i> | None                                                                         | 1.994            | Half, nonconserved      |
| <i>Siah2</i>             | Seven in absentia 2                                                          | 1.994            | Half, conserved         |
| <i>BC022687</i>          | cDNA sequence BC022687                                                       | 1.907            | Full and half conserved |
| <i>Rrm1</i>              | Ribonucleotide reductase M1                                                  | 1.890            | Half, conserved         |
| <i>Kcnk6</i>             | Potassium inwardly rectifying channel, subfamily K, member 6                 | 1.881            | Half, nonconserved      |
| <i>Foxf1a</i>            | Forkhead box F1a                                                             | 1.876            | Half, conserved         |
| <i>Ms4a4d</i>            | Membrane-spanning 4-domains, subfamily A, member 4D                          | 1.867            | Half, nonconserved      |
| <i>Rce1</i>              | RCE1 homologue, prenyl protein peptidase ( <i>Saccharomyces cerevisiae</i> ) | 1.860            | Full and half conserved |
| <i>Trim9</i>             | Tripartite motif-containing 9                                                | 1.845            | Half, nonconserved      |
| <i>Bcap29</i>            | B-cell receptor associated protein 29                                        | 1.844            | Half, nonconserved      |
| <i>Pop4</i>              | Processing of precursor 4, ribonuclease P/MRP family                         | 1.834            | Full and half conserved |
| <i>Dkk1</i> **           | Dickkopf homologue 1 ( <i>Xenopus laevis</i> )                               | 1.823            | Half, nonconserved      |
| <i>Kdr</i>               | Kinase insert domain protein receptor                                        | 1.822            | Half, nonconserved      |
| <i>Nek1</i>              | NIMA (never in mitosis gene a)-related expressed kinase 1                    | 1.811            | Full and half conserved |
| <i>Cacna2d3</i>          | Calcium channel, voltage-dependent, $\alpha$ 2/ $\delta$ subunit 3           | 1.798            | Half, nonconserved      |
| <i>Ulk2</i>              | Unc-51 like kinase 2 ( <i>Caenorhabditis elegans</i> )                       | 1.792            | Half, conserved         |
| <i>LOC100047504</i>      | None                                                                         | 1.780            | Half, nonconserved      |
| <i>Hhex</i>              | Hematopoietically expressed homeobox                                         | 1.776            | Half, conserved         |
| <i>Jph3</i>              | Junctophilin 3                                                               | 1.760            | Half, nonconserved      |
| <i>Guk1</i>              | Guanylate kinase 1                                                           | 1.758            | Half, nonconserved      |
| <i>Fli1</i>              | Friend leukemia integration 1                                                | 1.751            | Half, conserved         |
| <i>Ssca1</i>             | Sjogren syndrome/scleroderma autoantigen 1                                   | 1.749            | Half, conserved         |
| <i>Adar</i>              | Adenosine deaminase, RNA-specific                                            | 1.748            | Half, nonconserved      |
| <i>Tbx6</i> ***          | T-box 6                                                                      | 1.748            | Half, conserved         |
| <i>Ldlr</i>              | LDL receptor                                                                 | 1.746            | Half, nonconserved      |
| <i>Ndufb2</i>            | NADH dehydrogenase (ubiquinone) 1 $\beta$ subcomplex, 2                      | 1.728            | Full and half conserved |
| <i>Gpm</i>               | Glycerol-3-phosphate acyltransferase, mitochondrial                          | 1.723            | Half, conserved         |
| <i>Tal1</i>              | T-cell acute lymphocytic leukemia 1                                          | 1.717            | Half, nonconserved      |
| <i>Nphp1</i>             | Nephronophthisis 1 (juvenile) homologue (human)                              | 1.714            | Half, conserved         |
| <i>Slc25a16</i>          | Solute carrier family 25 (mitochondrial carrier, Graves disease)             | 1.700            | Half, conserved         |
| <i>Pdgfd</i>             | PDGF, D polypeptide                                                          | 1.698            | Half, conserved         |
| <i>Dll1</i> *            | $\delta$ -like 1 ( <i>Drosophila</i> )                                       | 1.695            | Half, conserved         |
| <i>Nup12</i>             | Nucleoporin like 2                                                           | 1.695            | Full, conserved         |
| <i>B230219D22Rik</i>     | RIKEN cDNA B230219D22 gene                                                   | 1.681            | Half, nonconserved      |
| <i>Prrx1</i>             | Paired related homeobox 1                                                    | 1.674            | Half, conserved         |
| <i>Zdhhc3</i>            | Zinc finger, DHHC domain containing 3                                        | 1.666            | Half, nonconserved      |
| <i>Snrk</i>              | SNF-related kinase                                                           | 1.664            | Half, nonconserved      |
| <i>Ikbkb</i>             | Inhibitor of $\kappa$ B kinase $\beta$                                       | 1.658            | Full, conserved         |
| <i>Sox17</i>             | SRY-box containing gene 17                                                   | 1.655            | Half, nonconserved      |
| <i>Stk16</i>             | Serine/threonine kinase 16                                                   | 1.636            | Half, conserved         |
| <i>Mrpl4</i>             | Mitochondrial ribosomal protein L4                                           | 1.630            | Half, nonconserved      |
| <i>Sbsn</i>              | Suprabasin                                                                   | 1.621            | Half, nonconserved      |
| <i>Tm6sf1</i>            | Transmembrane 6 superfamily member 1                                         | 1.621            | Half, nonconserved      |
| <i>Gaa</i>               | Glucosidase, $\alpha$ , acid                                                 | 1.618            | Half, nonconserved      |
| <i>Mrpl55</i>            | Mitochondrial ribosomal protein L55                                          | 1.614            | Half, conserved         |
| <i>Ddx28</i>             | DEAD (Asp-Glu-Ala-Asp) box polypeptide 28                                    | 1.613            | Full, conserved         |
| <i>Timm44</i>            | Translocase of inner mitochondrial membrane 44                               | 1.600            | Half, conserved         |
| <i>Panx1</i>             | Pannexin 1                                                                   | 1.591            | Half, conserved         |
| <i>Hmgcs1</i>            | 3-Hydroxy-3-methylglutaryl-CoA synthase 1                                    | 1.590            | Half, nonconserved      |
| <i>Syt13</i>             | Synaptotagmin XIII                                                           | 1.584            | Half, conserved         |

**Table S1. Cont.**

| Gene symbol            | MGI database object name                                        | Fold change down | CRE-site                   |
|------------------------|-----------------------------------------------------------------|------------------|----------------------------|
| <i>Bag2</i>            | BCL2-associated athanogene 2                                    | 1.581            | Half, conserved            |
| <i>Sc4mol</i>          | Sterol-C4-methyl oxidase-like                                   | 1.581            | Half, nonconserved         |
| <i>Insig1</i>          | Insulin induced gene 1                                          | 1.575            | Half, conserved            |
| <i>Clcn4-2</i>         | Chloride channel 4-2                                            | 1.573            | Full and half nonconserved |
| <i>Ppp1r14a</i>        | Protein phosphatase 1, regulatory (inhibitor) subunit 14A       | 1.570            | Half, nonconserved         |
| <i>Abca1</i>           | ATP-binding cassette, subfamily A (ABC1), member 1              | 1.563            | Half, nonconserved         |
| <i>Smarca1</i>         | SWI/SNF related, matrix associated, subfamily a, member 1       | 1.561            | Half, conserved            |
| <i>Olfm1</i>           | Olfactomedin 1                                                  | 1.534            | Half                       |
| <i>Enpp2</i>           | Ectonucleotide pyrophosphatase/phosphodiesterase 2              | 1.525            | Half, nonconserved         |
| <i>Kif18a</i>          | Kinesin family member 18A                                       | 1.520            | Half, nonconserved         |
| <i>Nfatc4</i>          | Nuclear factor of activated T cells, cytoplasmic, calcineurin 4 | 1.505            | Half, conserved            |
| <i>Gas5 // Snord47</i> | None                                                            | 1.503            | Full, conserved            |
| <i>Rnps1</i>           | RNA binding protein S1                                          | 1.503            | Half, conserved            |
| <i>Gpc1</i>            | Glypican 1                                                      | 1.500            | Half, nonconserved         |

Conserved CRE-sites are defined by conservation among human, mouse, and rat genomes. Nonconserved CRE-sites are only observed in one or two mammalian genomes. Gray columns indicate segmentation genes. CRE, cAMP responsive element.

\*Notch signaling, \*\*Wnt signaling, \*\*\*both.

**Table S2. PCR primer sets used in this study**

| Set                         | Primer                                                                                                                                                                                   |
|-----------------------------|------------------------------------------------------------------------------------------------------------------------------------------------------------------------------------------|
| <i>CREB<sup>+/-</sup></i>   | Forward primer: 5'-AAG CGC CAT TCG CCA TTC AGG C-3'<br>Reverse primer: 5'-GAT GTA CAA ACA TAC CAG ATC CGC-3'<br>LacZ primer: 5'-CAC AGA ACC TAC TGT TAG CAG ATG-3'                       |
| <i>T-Cre</i>                | Forward primer 5'-ATT TGC CTG CAT TAC CGG TC-3'<br>Reverse primer 5'-ATC AAC GTT TTC TTT TCG G-3'                                                                                        |
| <i>ROSA<sup>ACIAC</sup></i> | ROSA forward primer: 5'-GGA GCG GGA GAA ATG GAT ATG-3'<br>ROSA reverse primer: 5'-AAA GTC GCT CTG AGT TGT TAT-3'<br>A-CREB/CMV reverse primer: 5'-CTC CAT ATA TGG GCT ATG AAC TAA TGA-3' |
| <i>Dll-1 + CRE-site</i>     | Forward primer: 5'-TGG GCC CTC CCA ATA AAC TCA TTT-3'<br>Reverse primer: 5'-TCC GGC ACA TGT TTG AAA GAC TC-3'                                                                            |
| <i>Dll-1 - CRE-site</i>     | Forward primer: 5'-GGC TGT TAC AAA GGG CTC CTA A-3'<br>Reverse primer: 5'-GGC AAG TCA TGA TTG AGG TGA G-3'                                                                               |
| <i>Ripply2 + CRE-site</i>   | Forward primer: 5'-TGT GCC AGA CAT GCA ACA AG-3'<br>Reverse primer: 5'-GGG CTG CAA TGA CGT GAC TA-3'                                                                                     |
| <i>Ripply2 - CRE-site</i>   | Forward primer: 5'-CAC AGC TCC CGT TCT GTG AA-3'<br>Reverse primer: 5'-TTC CAA AGG CCA GAG GCT AC-3'                                                                                     |
